# Supplementary material for: Molecular determinants of αVβ5 localization in flat clathrin lattices – role of αVβ5 in cell adhesion and proliferation
Source: PubMed Central journal article supplement (PMC9234671; doi:10.1242/jcs.259465), 2022-06-06
Supplement: joces-135-259465-s1.pdf [file joces-135-259465-s1.pdf]

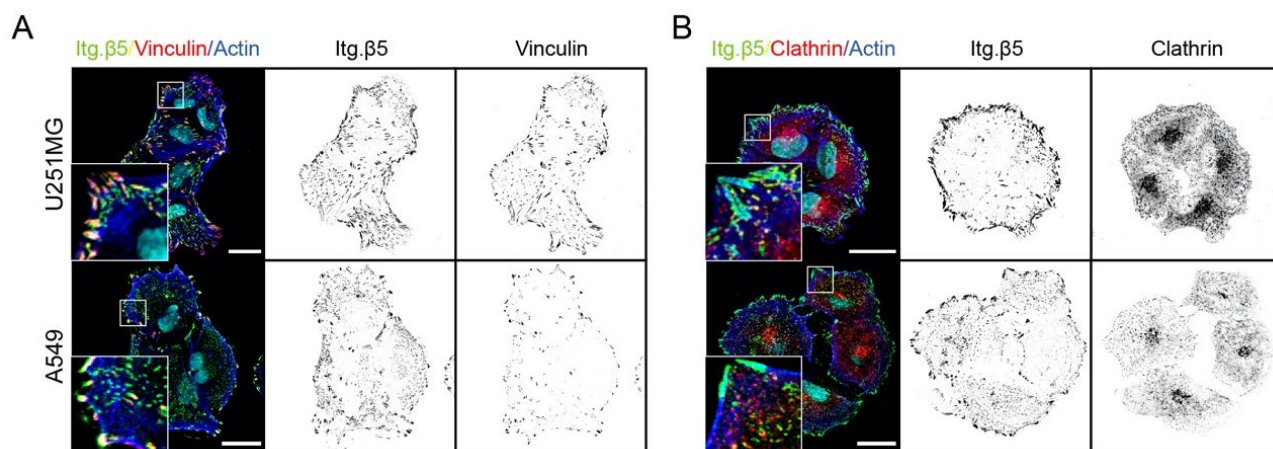

**Fig. S1. (A,B)** IF images of U251MG and A549 cells showing integrin  $\beta 5$  (green in merge), vinculin **(A)** or clathrin **(B)** (red in merge), actin (blue), DAPI (cyan). Scale bar, 20  $\mu\text{m}$ .

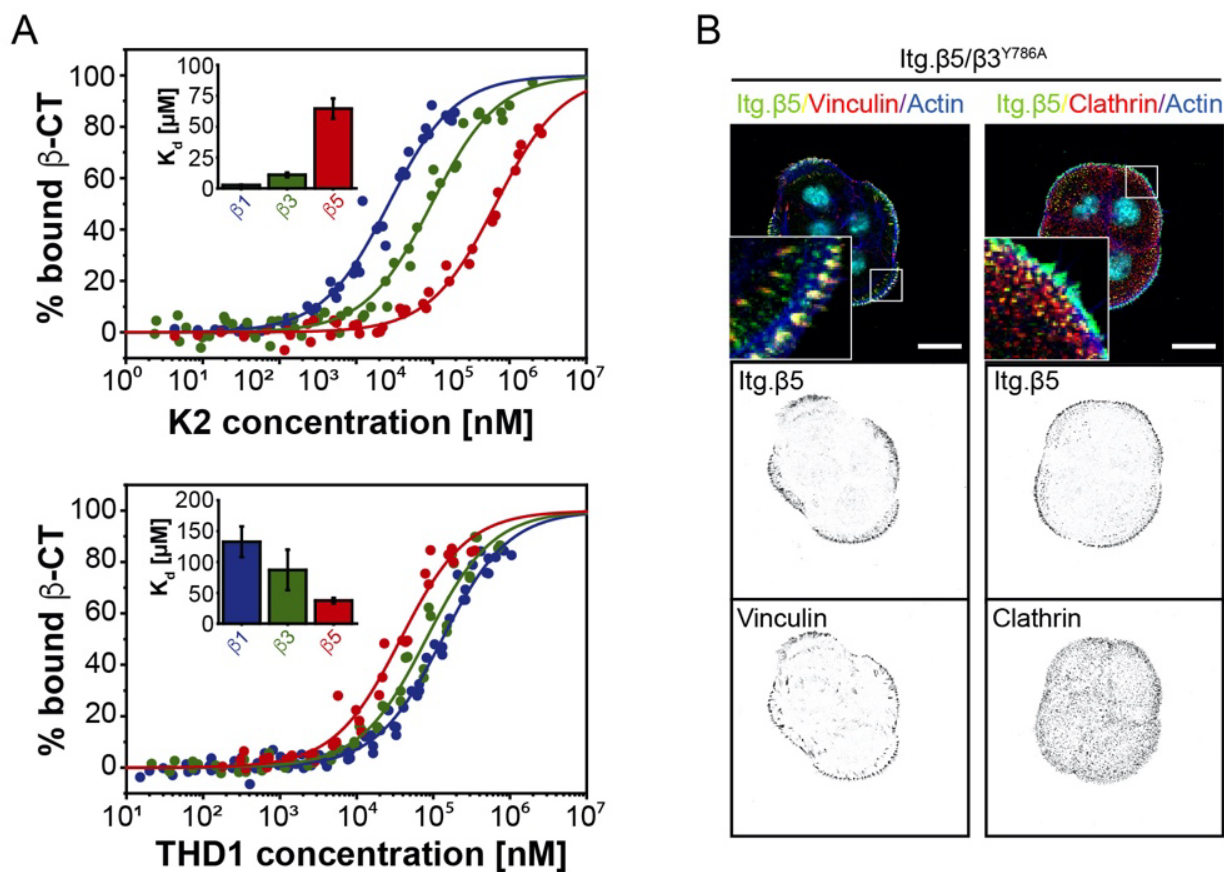

**Fig. S2. (A)** Titration of kindlin-2 (K2) and talin-1 head domain (THD1) to 200 nM ATTO488-labeled integrin  $\beta 1$ ,  $\beta 3$ , and  $\beta 5$  cytoplasmic tail peptides ( $\beta$ -CT) to measure affinity using MST ( $n \geq 3$ ). **(B)** Colocalization of the integrin  $\beta 5^{ex}/\beta 3^{in}$  chimera containing a Y786A mutation in the MD-NxxY motif (green in merge) with vinculin (red; left panel) or clathrin (red; right panel) in  $\beta 5$ -deficient PA-JEB/ $\beta 4$  keratinocytes. Actin is shown in blue. Nuclei are stained with DAPI (cyan). Scale bar, 20  $\mu$ m.

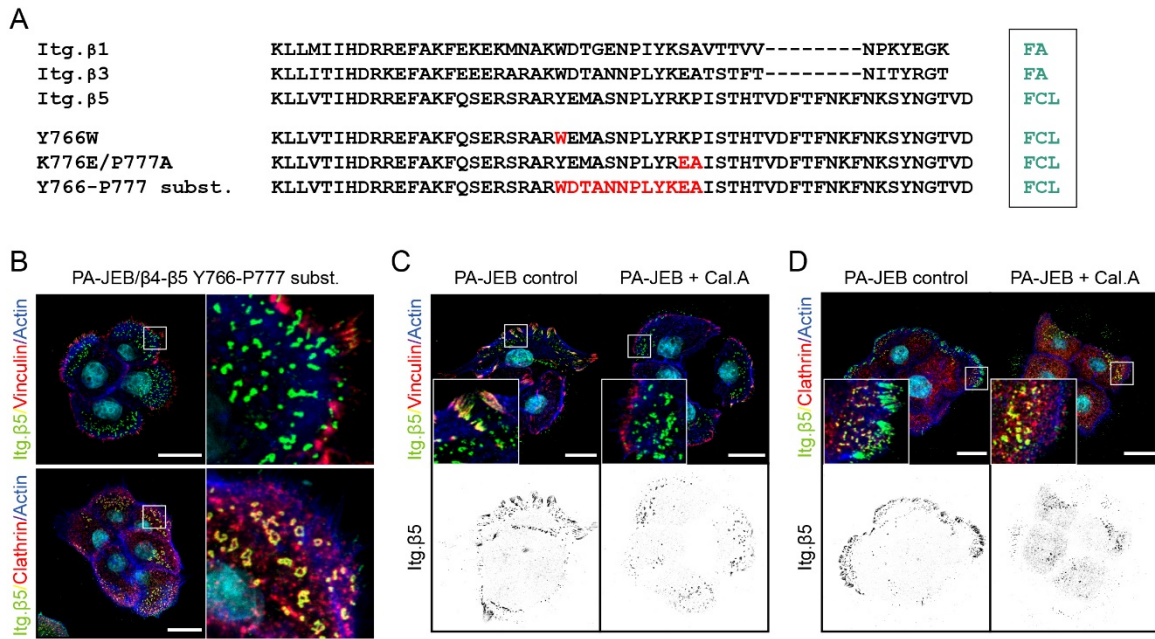

**Fig. S3. (A)** Amino acid sequences of the cytoplasmic domain of wild-type integrin  $\beta$ 1,  $\beta$ 3,  $\beta$ 5 and  $\beta$ 5 carrying mutations surrounding the membrane-proximal NPLY motif. The subcellular distribution of the integrin  $\beta$  subunits in FAs or FCLs is indicated. **(B)** Representative confocal microscopy images show that the integrin  $\beta$ 5 mutant, carrying a substitution of 12 amino acids from  $\beta$ 3 into  $\beta$ 5 (Y766-P777 subst.) localizes predominantly in FCLs in PA-JEB/ $\beta$ 4 keratinocytes **(C,D)** PA-JEB keratinocytes were grown in 10% FCS-supplemented DMEM culture medium overnight and then treated with 5 nM calyculin A (Cal.A) or DMSO (vehicle control) for 30 min prior to fixation. Merged images show integrin  $\beta$ 5 (green), vinculin **(B,C)** or clathrin **(B,D)** (red), actin (blue) and the cell nuclei (cyan). Scale bar, 20  $\mu$ m.

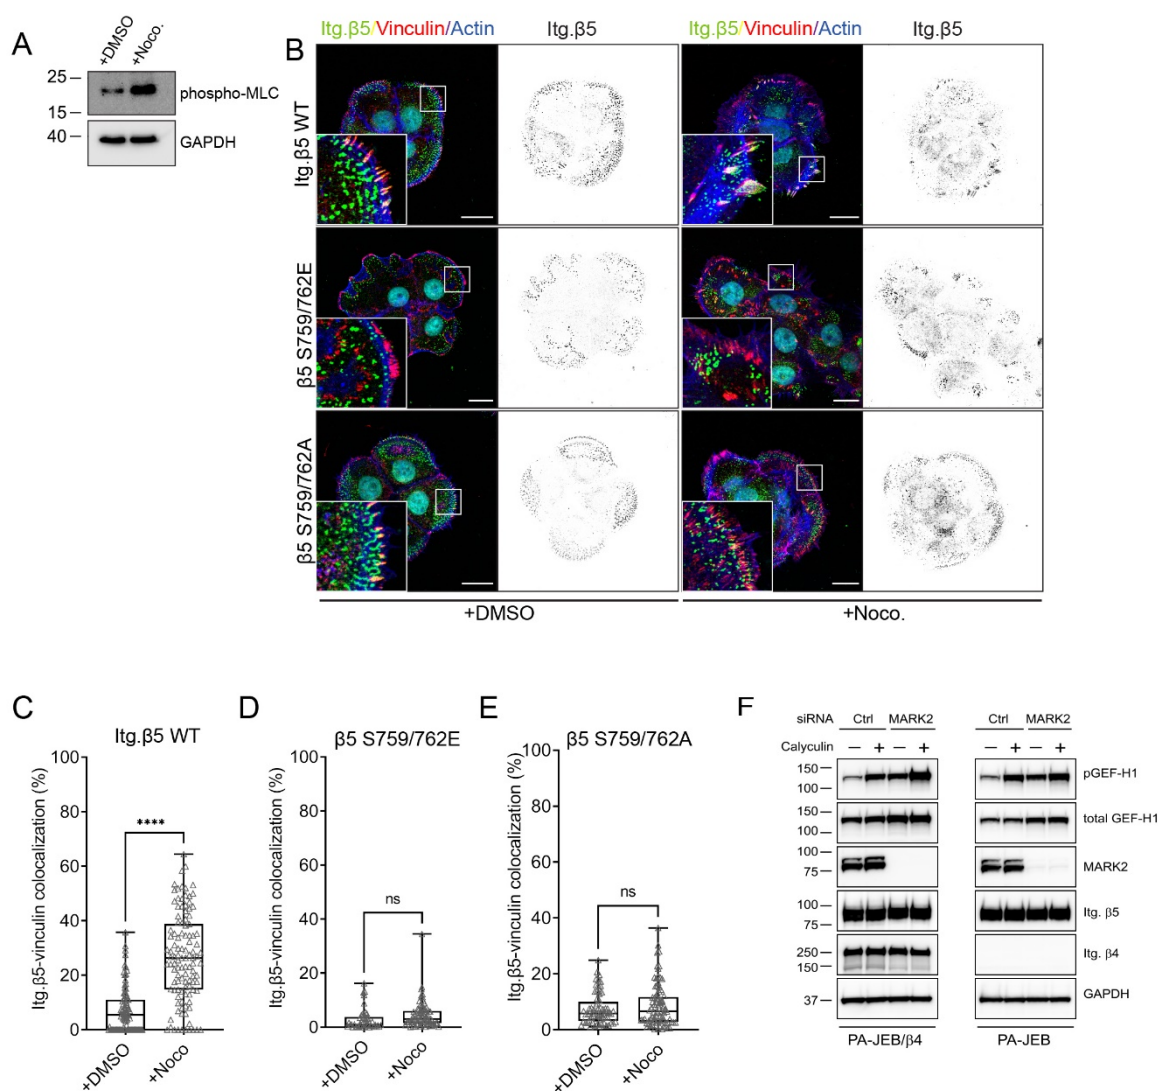

**Fig. S4. (A)** Representative western blots of phosphorylated myosin light chain (MLC) and GAPDH in PA-JEB/β4 keratinocytes treated with DMSO versus Nocodazole. **(B-E)** Analysis of integrin β5 clustering in FAs **(C)** in β5-deficient keratinocytes expressing wild-type β5, and β5 containing S759/762E or S759/762A mutations. Merged images show integrin β5 (green), vinculin (red), actin (blue) and the cell nuclei (cyan) **(C)**. Scale bar, 20 μm. Quantifications of β5 or β5 mutants clustering in FAs are shown in **(C-E)**. Data were obtained from three independent experiments. Total cells analyzed per condition: 90 (WT, DMSO), 111 (WT, Noco.) **(C)**, 40 (S>E, DMSO), 80 (S>E, Noco.) **(D)**, 65 (S>A, DMSO), 82 (S>A, Noco.) **(E)**. Mann-Whitney U test was performed to determine statistical significance. \*\*\*\*, P < 0.0001. Box plots range from the 25th to 75th percentile; central line indicates the median; whiskers show smallest to largest value. **(F)** Representative western blots of phosphorylated GEF-H1, total GEF-H1 and MARK2 in PA-JEB/β4 and PA-JEB keratinocytes treated with or without siMARK2 combined with calyculin A. Integrin β4, β5 and GAPDH served as controls. (n=3).

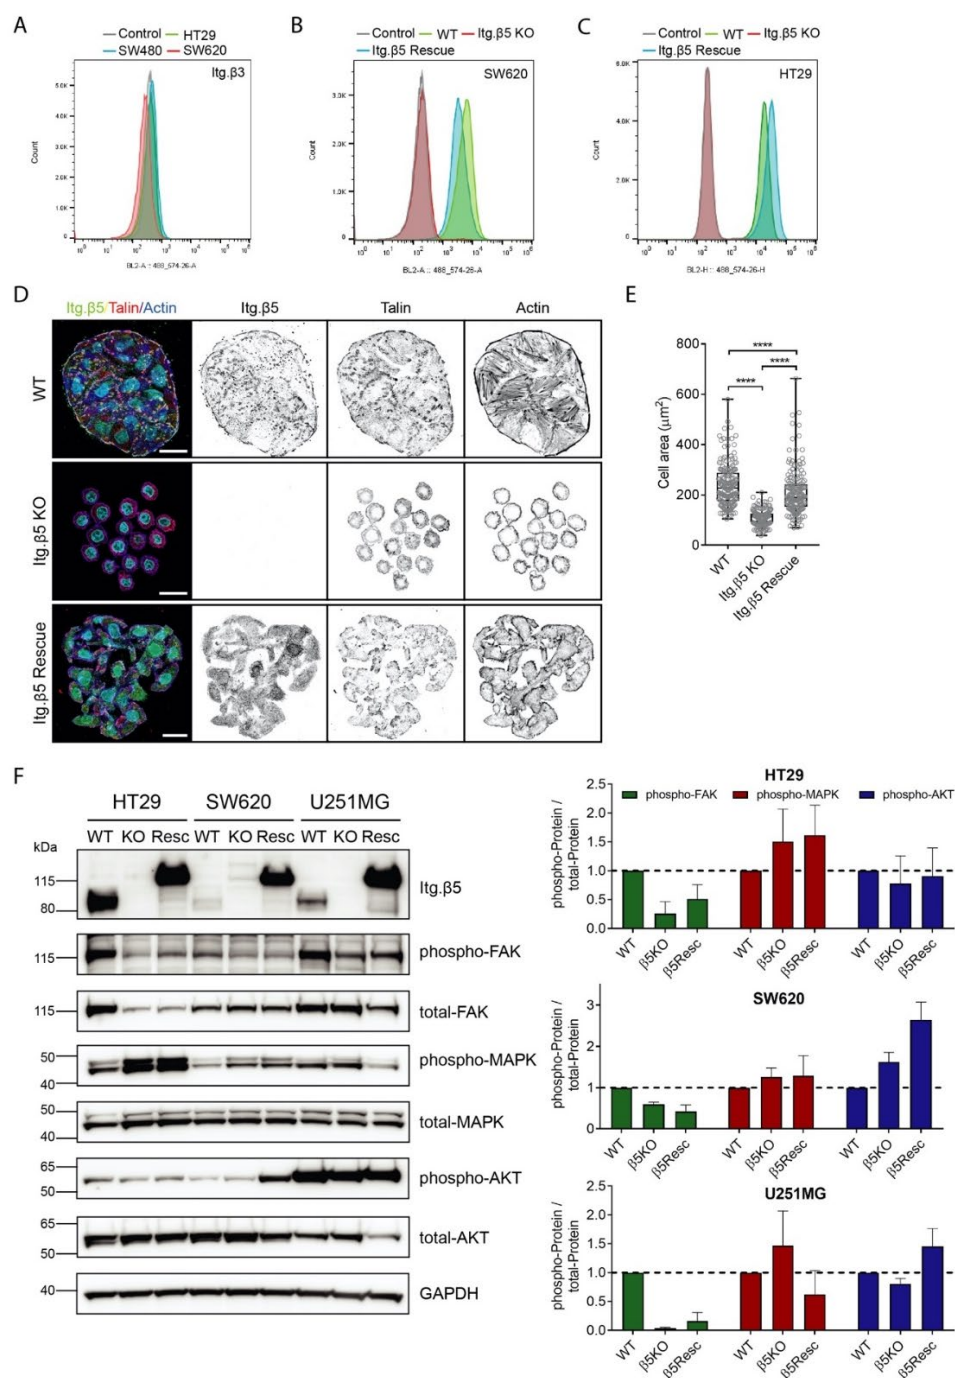

**Fig. S5. (A)** FACS plots showing the expression of integrin  $\beta 3$  in HT29, SW480, and SW620 cells. HT29 cells stained with a secondary PE-conjugated antibody only were used as negative control ( $n=3$ ). **(B,C)** FACS plots showing the expression of  $\beta 5$  in SW620 **(B)** and HT29 **(C)** wild-type,  $\beta 5$  knockout and rescued cells. Cells stained with a secondary PE-conjugated antibody only were used as negative control ( $n=2-3$ ). **(D)** HT29 cells were fixed after 5 days and merged images show integrin  $\beta 5$  (green), talin (red), actin (blue) and the cell nuclei (cyan). Scale bar, 20  $\mu m$ . **(E)** Quantifications of the cell area of HT29 wild-type,  $\beta 5$  knockout and rescued cells. Data were obtained from three independent experiments. Total cells analyzed per condition: 179 (WT), 161 (KO), 172 (Resc.) Mann-Whitney U test was performed to determine statistical significance. \*\*\*\*,  $P < 0.0001$ . Box plots range from the 25th to 75th percentile; central line indicates the median; whiskers show smallest to largest value. **(F)** Representative western blots of phosphorylated FAK, MAPK, AKT in wild-type,  $\beta 5$ -deficient (KO) and  $\beta 5$  rescued (Resc.) cell lines. Quantifications of signal intensities of the phosphorylated proteins normalized to total proteins levels are shown ( $n=3$ ; bars show mean with s.d.).

**Table S1. Overview of cells that form integrin  $\beta$ 5-containing FCLs**

| Cells                                                                                                                                                                                                                                                                                                                                                                                                                    | Adhesion complex                                                  | Reference                    |
|--------------------------------------------------------------------------------------------------------------------------------------------------------------------------------------------------------------------------------------------------------------------------------------------------------------------------------------------------------------------------------------------------------------------------|-------------------------------------------------------------------|------------------------------|
| A375 human melanoma cells<br>A549 human lung carcinoma cells<br>U2OS human osteosarcoma cells<br>CS1 hamster melanoma cells<br>HeLa human cervical carcinoma cells<br>MCF7 human breast carcinoma cells<br>BT549 ductal breast carcinoma cells<br>Human hTERT microvascular endothelial (HME1) cells<br>Human hTERT immortalized retinal pigment epithelial (RPE1) cells<br>Primary mouse aortic endothelial (MAE) cells | “Reticular adhesions”                                             | (Lock et al., 2018)          |
| PA-JEB/ $\beta$ 4 and HaCaT human keratinocytes                                                                                                                                                                                                                                                                                                                                                                          | Flat clathrin lattices/plaques                                    | (Zuidema et al., 2018)       |
| HeLa human cervical carcinoma cells*<br>HepG2 human liver carcinoma*<br>Caco-2 human colorectal adenocarcinoma cells*<br><i>* When cultured on glass or on collagen-coated polyacrylamide 31 kPa gels</i>                                                                                                                                                                                                                | “Clathrin-coated plaques”                                         | (Baschieri et al., 2018)     |
| HeLa human cervical carcinoma cells                                                                                                                                                                                                                                                                                                                                                                                      | Flat clathrin lattices/plaques                                    | (Leyton-Puig et al., 2017)   |
| Primary mouse myotubes                                                                                                                                                                                                                                                                                                                                                                                                   | Flat clathrin lattices/plaques                                    | (Vassilopoulos et al., 2014) |
| Primary rat myotubes                                                                                                                                                                                                                                                                                                                                                                                                     | “Clathrin-coated membrane domains”                                | (De Deyne et al., 1998)      |
| M21 human melanoma cells<br>H2981 and UCLA-P3 lung carcinoma cells                                                                                                                                                                                                                                                                                                                                                       | “Punctate distribution over the ventral cell surface outside FAs” | (Wayner et al., 1991)        |

- BASCHIERI, F., DAYOT, S., ELKHATIB, N., LY, N., CAPMANY, A., SCHAUER, K., BETZ, T., VIGNJEVIC, D. M., POINCLOUX, R. & MONTAGNAC, G. 2018. Frustrated endocytosis controls contractility-independent mechanotransduction at clathrin-coated structures. *Nat Commun*, 9, 3825.
- DE DEYNE, P. G., O'NEILL, A., RESNECK, W. G., DMYTRENKO, G. M., PUMPLIN, D. W. & BLOCH, R. J. 1998. The vitronectin receptor associates with clathrin-coated membrane domains via the cytoplasmic domain of its beta5 subunit. *J Cell Sci*, 111 ( Pt 18), 2729-40.
- LEYTON-PUIG, D., ISOGAI, T., ARGENZIO, E., VAN DEN BROEK, B., KLARENBEEK, J., JANSSEN, H., JALINK, K. & INNOCENTI, M. 2017. Flat clathrin lattices are dynamic actin-controlled hubs for clathrin-mediated endocytosis and signalling of specific receptors. *Nat Commun*, 8, 16068.
- LOCK, J. G., JONES, M. C., ASKARI, J. A., GONG, X., ODDONE, A., OLOFSSON, H., GORANSSON, S., LAKADAMYALI, M., HUMPHRIES, M. J. & STROMBLAD, S. 2018. Reticular adhesions are a distinct class of cell-matrix adhesions that mediate attachment during mitosis. *Nat Cell Biol*, 20, 1290-1302.
- VASSILOPOULOS, S., GENTIL, C., LAINE, J., BUCLEZ, P. O., FRANCK, A., FERRY, A., PRECIGOUT, G., ROTH, R., HEUSER, J. E., BRODSKY, F. M., GARCIA, L., BONNE, G., VOIT, T., PIETRI-ROUXEL, F. & BITOUN, M. 2014. Actin scaffolding by clathrin heavy chain is required for skeletal muscle sarcomere organization. *J Cell Biol*, 205, 377-93.
- WAYNER, E. A., ORLANDO, R. A. & CHERESH, D. A. 1991. Integrins alpha v beta 3 and alpha v beta 5 contribute to cell attachment to vitronectin but differentially distribute on the cell surface. *J Cell Biol*, 113, 919-29.
- ZUIDEMA, A., WANG, W., KREFT, M., TE MOLDER, L., HOEKMAN, L., BLEIJERVELD, O. B., NAHIDIAZAR, L., JANSSEN, H. & SONNENBERG, A. 2018. Mechanisms of integrin alphaVbeta5 clustering in flat clathrin lattices. *J Cell Sci*, 131.

**Table S2.** Itg.  $\beta$ 6 vs Itg.  $\beta$ 5\_IP\_PA-JEB/ $\beta$ 4

|                      |                      |                                                                                     |                                                               |                                                                | <b>Two color points Chart 1.</b> |                        |
|----------------------|----------------------|-------------------------------------------------------------------------------------|---------------------------------------------------------------|----------------------------------------------------------------|----------------------------------|------------------------|
| <b>Gene(s)</b>       | <b>-LOG(P-value)</b> | <b>LFQ Abundance ratio (Itg.<math>\beta</math>6/Itg.<math>\beta</math>5) (2Log)</b> | <b>Significant or Not Significant FDR = 0.05 and S0 = 0.1</b> | <b>Significant or Not Significant_F DR = 0.05 and S0 = 0.1</b> | <b>Significant</b>               | <b>Not significant</b> |
| IGLV3-9              | 3,046                | 3,318                                                                               | +                                                             | Significant                                                    | 3,318                            | #N/A                   |
| ARHGAP10             | 4,541                | 3,607                                                                               | +                                                             | Significant                                                    | 3,607                            | #N/A                   |
| NOP56                | 3,240                | 3,635                                                                               | +                                                             | Significant                                                    | 3,635                            | #N/A                   |
| ANKRD28              | 2,092                | -3,244                                                                              | +                                                             | Significant                                                    | -3,244                           | #N/A                   |
| P4HA2                | 4,235                | 3,646                                                                               | +                                                             | Significant                                                    | 3,646                            | #N/A                   |
| KLK10                | 1,572                | -1,717                                                                              | +                                                             | Significant                                                    | -1,717                           | #N/A                   |
| HNRNPR               | 1,776                | 1,696                                                                               | +                                                             | Significant                                                    | 1,696                            | #N/A                   |
| HTRA2                | 3,736                | -4,106                                                                              | +                                                             | Significant                                                    | -4,106                           | #N/A                   |
| BUB3                 | 2,754                | 1,813                                                                               | +                                                             | Significant                                                    | 1,813                            | #N/A                   |
| MYO1B                | 4,054                | 3,411                                                                               | +                                                             | Significant                                                    | 3,411                            | #N/A                   |
| PRMT3                | 1,566                | -1,977                                                                              | +                                                             | Significant                                                    | -1,977                           | #N/A                   |
| C;HIST1H2BD;HIST1H2  | 4,601                | 4,542                                                                               | +                                                             | Significant                                                    | 4,542                            | #N/A                   |
| DKC1                 | 1,495                | 1,724                                                                               | +                                                             | Significant                                                    | 1,724                            | #N/A                   |
| H2AFY                | 3,061                | 2,289                                                                               | +                                                             | Significant                                                    | 2,289                            | #N/A                   |
| ECI2                 | 2,425                | 2,079                                                                               | +                                                             | Significant                                                    | 2,079                            | #N/A                   |
| UBR5                 | 2,962                | -2,597                                                                              | +                                                             | Significant                                                    | -2,597                           | #N/A                   |
| NDUFB4               | 2,331                | 2,092                                                                               | +                                                             | Significant                                                    | 2,092                            | #N/A                   |
| ASMTL                | 1,788                | 2,473                                                                               | +                                                             | Significant                                                    | 2,473                            | #N/A                   |
| STAU1                | 2,392                | -3,848                                                                              | +                                                             | Significant                                                    | -3,848                           | #N/A                   |
| AIFM1                | 3,776                | 2,890                                                                               | +                                                             | Significant                                                    | 2,890                            | #N/A                   |
| PLG                  | 3,507                | 3,019                                                                               | +                                                             | Significant                                                    | 3,019                            | #N/A                   |
| ASS1                 | 2,614                | 2,433                                                                               | +                                                             | Significant                                                    | 2,433                            | #N/A                   |
| C5                   | 1,979                | -1,223                                                                              | +                                                             | Significant                                                    | -1,223                           | #N/A                   |
| LMNA                 | 1,995                | 1,656                                                                               | +                                                             | Significant                                                    | 1,656                            | #N/A                   |
| TFRC                 | 3,860                | 1,440                                                                               | +                                                             | Significant                                                    | 1,440                            | #N/A                   |
| RPLP0;RPLPOP6        | 2,117                | -0,830                                                                              | +                                                             | Significant                                                    | -0,830                           | #N/A                   |
| KRT18                | 2,723                | 0,958                                                                               | +                                                             | Significant                                                    | 0,958                            | #N/A                   |
| IGKV4-1              | 3,093                | 1,443                                                                               | +                                                             | Significant                                                    | 1,443                            | #N/A                   |
| ITGAV                | 4,376                | -1,840                                                                              | +                                                             | Significant                                                    | -1,840                           | #N/A                   |
| F;PCL1;HNRNPCL3;HNRN | 1,966                | 2,276                                                                               | +                                                             | Significant                                                    | 2,276                            | #N/A                   |
| RHOC;RHOA            | 3,723                | 2,276                                                                               | +                                                             | Significant                                                    | 2,276                            | #N/A                   |
| HSP90AB1             | 2,916                | -0,890                                                                              | +                                                             | Significant                                                    | -0,890                           | #N/A                   |
| PDHA1                | 1,438                | -2,069                                                                              | +                                                             | Significant                                                    | -2,069                           | #N/A                   |
| LGALS1               | 4,904                | 3,580                                                                               | +                                                             | Significant                                                    | 3,580                            | #N/A                   |
| DLD                  | 1,692                | -1,450                                                                              | +                                                             | Significant                                                    | -1,450                           | #N/A                   |
| H2AFV;H2AFZ          | 1,461                | 2,230                                                                               | +                                                             | Significant                                                    | 2,230                            | #N/A                   |
| F;HIST1H2AH;HIST1H2  | 2,694                | 1,792                                                                               | +                                                             | Significant                                                    | 1,792                            | #N/A                   |
| PABPC1               | 3,001                | 0,438                                                                               | +                                                             | Significant                                                    | 0,438                            | #N/A                   |
| HARS                 | 2,417                | 1,934                                                                               | +                                                             | Significant                                                    | 1,934                            | #N/A                   |
| CKMT1A               | 2,446                | -1,097                                                                              | +                                                             | Significant                                                    | -1,097                           | #N/A                   |
| P4HA1                | 2,344                | -2,646                                                                              | +                                                             | Significant                                                    | -2,646                           | #N/A                   |



|                            |       |        |   |             |        |      |
|----------------------------|-------|--------|---|-------------|--------|------|
| HNRNPL                     | 1,741 | 1,978  | + | Significant | 1,978  | #N/A |
| EZR                        | 1,803 | -0,968 | + | Significant | -0,968 | #N/A |
| HIST1H1B                   | 1,369 | 2,592  | + | Significant | 2,592  | #N/A |
| HIST1H1C;HIST1H1E;HIST1H1F | 3,791 | 3,614  | + | Significant | 3,614  | #N/A |
| PRKACA;PRKACB              | 2,163 | -2,032 | + | Significant | -2,032 | #N/A |
| PTPN1                      | 2,271 | 2,104  | + | Significant | 2,104  | #N/A |
| ITGB5                      | 3,797 | -9,138 | + | Significant | -9,138 | #N/A |
| RPL7                       | 2,075 | -0,537 | + | Significant | -0,537 | #N/A |
| ITGB6                      | 4,613 | 7,066  | + | Significant | 7,066  | #N/A |
| ITIH2                      | 3,321 | -4,168 | + | Significant | -4,168 | #N/A |
| LMNB1                      | 1,502 | 2,049  | + | Significant | 2,049  | #N/A |
| SDHB                       | 4,055 | -3,434 | + | Significant | -3,434 | #N/A |
| TGM2                       | 1,317 | -2,680 | + | Significant | -2,680 | #N/A |
| FBL                        | 2,017 | 3,016  | + | Significant | 3,016  | #N/A |
| HNRNPA2B1                  | 1,781 | 1,862  | + | Significant | 1,862  | #N/A |
| SFPQ                       | 1,672 | 1,161  | + | Significant | 1,161  | #N/A |
| CFL1                       | 2,713 | 2,693  | + | Significant | 2,693  | #N/A |
| DGKA                       | 1,816 | -1,688 | + | Significant | -1,688 | #N/A |
| AZGP1                      | 3,060 | -0,609 | + | Significant | -0,609 | #N/A |
| DDX6                       | 2,691 | -1,391 | + | Significant | -1,391 | #N/A |
| RPL13                      | 2,011 | -0,740 | + | Significant | -0,740 | #N/A |
| SDHA                       | 3,755 | -6,512 | + | Significant | -6,512 | #N/A |
| RRM2                       | 4,351 | -5,297 | + | Significant | -5,297 | #N/A |
| HNRNPH3                    | 1,701 | 1,231  | + | Significant | 1,231  | #N/A |
| HNRNPH1                    | 3,266 | 4,403  | + | Significant | 4,403  | #N/A |
| YWHAB                      | 3,485 | -1,871 | + | Significant | -1,871 | #N/A |
| PYCR1                      | 3,905 | -2,810 | + | Significant | -2,810 | #N/A |
| KIF5B                      | 3,016 | -2,852 | + | Significant | -2,852 | #N/A |
| MYH10                      | 3,368 | 4,055  | + | Significant | 4,055  | #N/A |
| ADD1                       | 2,321 | -2,061 | + | Significant | -2,061 | #N/A |
| DLST                       | 3,790 | -1,732 | + | Significant | -1,732 | #N/A |
| ATP6V1A                    | 1,321 | 5,315  | + | Significant | 5,315  | #N/A |
| EIF4A3                     | 1,693 | 1,868  | + | Significant | 1,868  | #N/A |
| RFC3                       | 2,561 | -1,602 | + | Significant | -1,602 | #N/A |
| TMPO                       | 1,645 | 1,498  | + | Significant | 1,498  | #N/A |
| RPS27                      | 1,932 | 0,793  | + | Significant | 0,793  | #N/A |
| MATR3                      | 1,718 | 3,197  | + | Significant | 3,197  | #N/A |
| CSNK1A1;CSNK1A1L           | 2,150 | -0,964 | + | Significant | -0,964 | #N/A |
| CSNK1D                     | 1,385 | -3,044 | + | Significant | -3,044 | #N/A |
| NUMB                       | 2,408 | 2,110  | + | Significant | 2,110  | #N/A |
| HSD17B4                    | 2,051 | 0,941  | + | Significant | 0,941  | #N/A |
| HMGA2                      | 3,275 | 1,428  | + | Significant | 1,428  | #N/A |
| ACLY                       | 4,584 | -6,383 | + | Significant | -6,383 | #N/A |
| VCP                        | 3,146 | -4,291 | + | Significant | -4,291 | #N/A |
| NHP2L1                     | 1,938 | 2,498  | + | Significant | 2,498  | #N/A |
| HNRNPK                     | 1,935 | 1,262  | + | Significant | 1,262  | #N/A |
| YWHAG                      | 4,423 | -1,788 | + | Significant | -1,788 | #N/A |
| RPS8                       | 2,212 | -0,660 | + | Significant | -0,660 | #N/A |
| RPS15A                     | 3,084 | -0,355 | + | Significant | -0,355 | #N/A |
| YWHAE                      | 5,886 | -1,540 | + | Significant | -1,540 | #N/A |

|               |       |         |   |             |         |      |
|---------------|-------|---------|---|-------------|---------|------|
| SNRPD3        | 2,590 | 1,957   | + | Significant | 1,957   | #N/A |
| HIST1H4A      | 1,726 | 2,102   | + | Significant | 2,102   | #N/A |
| RPL8          | 2,982 | -0,930  | + | Significant | -0,930  | #N/A |
| YWHAZ         | 5,099 | -1,661  | + | Significant | -1,661  | #N/A |
| GTF2I         | 2,948 | -3,183  | + | Significant | -3,183  | #N/A |
| SLC25A11      | 2,523 | 0,509   | + | Significant | 0,509   | #N/A |
| REL           | 2,530 | 1,645   | + | Significant | 1,645   | #N/A |
| YWHAH         | 3,560 | -2,246  | + | Significant | -2,246  | #N/A |
| CSTF1         | 2,848 | 2,495   | + | Significant | 2,495   | #N/A |
| CALD1         | 1,551 | -2,618  | + | Significant | -2,618  | #N/A |
| CKAP4         | 2,151 | -0,809  | + | Significant | -0,809  | #N/A |
| KLC1          | 2,532 | -3,055  | + | Significant | -3,055  | #N/A |
| GOLGA2        | 2,251 | -2,818  | + | Significant | -2,818  | #N/A |
| ILF3          | 2,106 | 1,180   | + | Significant | 1,180   | #N/A |
| CSTF3         | 2,970 | 1,971   | + | Significant | 1,971   | #N/A |
| TRIM28        | 2,767 | 1,426   | + | Significant | 1,426   | #N/A |
| G3BP1         | 3,934 | 2,077   | + | Significant | 2,077   | #N/A |
| PKP1          | 1,681 | 1,144   | + | Significant | 1,144   | #N/A |
| DDX39B;DDX39A | 1,526 | 1,739   | + | Significant | 1,739   | #N/A |
| CUX1          | 3,241 | -3,089  | + | Significant | -3,089  | #N/A |
| CAPRIN1       | 4,080 | 4,006   | + | Significant | 4,006   | #N/A |
| DSC3          | 2,179 | 2,226   | + | Significant | 2,226   | #N/A |
| KPNB1         | 1,973 | 0,742   | + | Significant | 0,742   | #N/A |
| NUMA1         | 2,245 | 2,056   | + | Significant | 2,056   | #N/A |
| GAPVD1        | 2,583 | -10,265 | + | Significant | -10,265 | #N/A |
| EBP           | 2,240 | 1,856   | + | Significant | 1,856   | #N/A |
| PLCB4         | 3,696 | -2,618  | + | Significant | -2,618  | #N/A |
| PLEC          | 2,111 | 0,872   | + | Significant | 0,872   | #N/A |
| PCBP1         | 4,077 | 2,000   | + | Significant | 2,000   | #N/A |
| SF3B3         | 2,386 | 2,005   | + | Significant | 2,005   | #N/A |
| MAPRE1        | 2,268 | -2,875  | + | Significant | -2,875  | #N/A |
| DPYSL2        | 1,431 | 1,757   | + | Significant | 1,757   | #N/A |
| SRSF7         | 1,485 | 1,756   | + | Significant | 1,756   | #N/A |
| UPP1          | 1,482 | 3,322   | + | Significant | 3,322   | #N/A |
| UGP2          | 2,568 | -1,294  | + | Significant | -1,294  | #N/A |
| IMMT          | 1,962 | 0,824   | + | Significant | 0,824   | #N/A |
| SMU1          | 1,879 | 2,483   | + | Significant | 2,483   | #N/A |
| TMEM201       | 1,770 | 0,806   | + | Significant | 0,806   | #N/A |
| FAM160B1      | 2,287 | -3,294  | + | Significant | -3,294  | #N/A |
| CDC42BPG      | 3,630 | -3,465  | + | Significant | -3,465  | #N/A |
| PTRF          | 2,025 | 0,649   | + | Significant | 0,649   | #N/A |
| MARK2         | 4,950 | -8,079  | + | Significant | -8,079  | #N/A |
| PM20D2        | 2,761 | 2,858   | + | Significant | 2,858   | #N/A |
| KIAA0319L     | 3,313 | 3,185   | + | Significant | 3,185   | #N/A |
| LSM14A        | 3,584 | -3,960  | + | Significant | -3,960  | #N/A |
| MCU           | 2,069 | 0,579   | + | Significant | 0,579   | #N/A |
| NPLOC4        | 3,408 | -4,260  | + | Significant | -4,260  | #N/A |
| GEMIN5        | 3,102 | 2,212   | + | Significant | 2,212   | #N/A |
| TTN           | 4,298 | -2,957  | + | Significant | -2,957  | #N/A |
| DDX1          | 3,071 | 0,786   | + | Significant | 0,786   | #N/A |

|          |       |        |   |             |        |      |
|----------|-------|--------|---|-------------|--------|------|
| ARHGEF1  | 3,709 | -4,986 | + | Significant | -4,986 | #N/A |
| ARHGEF2  | 3,429 | -4,971 | + | Significant | -4,971 | #N/A |
| HOOK2    | 2,979 | -3,713 | + | Significant | -3,713 | #N/A |
| EDC3     | 3,578 | 3,415  | + | Significant | 3,415  | #N/A |
| GRAMD3   | 2,869 | 2,056  | + | Significant | 2,056  | #N/A |
| DOCK7    | 3,216 | 0,893  | + | Significant | 0,893  | #N/A |
| CLCC1    | 1,703 | 1,127  | + | Significant | 1,127  | #N/A |
| HNRNPAB  | 1,388 | 1,791  | + | Significant | 1,791  | #N/A |
| C9orf156 | 3,619 | -3,401 | + | Significant | -3,401 | #N/A |
| PRKD2    | 1,978 | 1,882  | + | Significant | 1,882  | #N/A |
| VPS33B   | 2,982 | -2,284 | + | Significant | -2,284 | #N/A |
| C2orf44  | 3,465 | -5,314 | + | Significant | -5,314 | #N/A |
| RPRD1B   | 2,819 | 2,038  | + | Significant | 2,038  | #N/A |
| DDX21    | 1,903 | 2,703  | + | Significant | 2,703  | #N/A |
| ABHD10   | 2,664 | -1,901 | + | Significant | -1,901 | #N/A |
| TECR     | 2,270 | 0,548  | + | Significant | 0,548  | #N/A |
| LIMA1    | 3,399 | 4,530  | + | Significant | 4,530  | #N/A |
| PSME2    | 2,114 | -2,077 | + | Significant | -2,077 | #N/A |
| CORO1C   | 2,268 | 1,837  | + | Significant | 1,837  | #N/A |
| G3BP2    | 2,465 | 1,851  | + | Significant | 1,851  | #N/A |
| NUDC     | 5,287 | -9,348 | + | Significant | -9,348 | #N/A |
| NOP58    | 2,673 | 2,825  | + | Significant | 2,825  | #N/A |
| SNX24    | 3,260 | -3,295 | + | Significant | -3,295 | #N/A |
| MTCL1    | 6,898 | -8,439 | + | Significant | -8,439 | #N/A |
| MYO5A    | 2,622 | 4,691  | + | Significant | 4,691  | #N/A |
| SAMM50   | 3,107 | 2,143  | + | Significant | 2,143  | #N/A |
| ARFGEF1  | 4,747 | 2,728  | + | Significant | 2,728  | #N/A |

Table S3. Itg.  $\beta$ 6 vs Itg.  $\beta$ 5\_IP\_HaCat

| Gene(s)       | -LOG(P-value) | LFQ Abundance ratio (ITGB6/ITGB5) (2Log) | Significant or Not Significant FDR = 0.05 and S0 = 0.1 | Significant or Not Significant_FD R = 0.05 and S0 = 0.1 | Two color points Chart 1: |                 |
|---------------|---------------|------------------------------------------|--------------------------------------------------------|---------------------------------------------------------|---------------------------|-----------------|
|               |               |                                          |                                                        |                                                         | Significant               | Not significant |
| IGLV3-9       | 3,647         | 4,764                                    | +                                                      | Significant                                             | 4,764                     | #N/A            |
| CUX2          | 4,866         | -6,418                                   | +                                                      | Significant                                             | -6,418                    | #N/A            |
| P4HA2         | 2,776         | 3,298                                    | +                                                      | Significant                                             | 3,298                     | #N/A            |
| HTRA2         | 2,725         | -3,825                                   | +                                                      | Significant                                             | -3,825                    | #N/A            |
| NUDT21        | 1,612         | -1,364                                   | +                                                      | Significant                                             | -1,364                    | #N/A            |
| PPL           | 2,140         | 1,788                                    | +                                                      | Significant                                             | 1,788                     | #N/A            |
| SYNCRIP       | 2,151         | 0,549                                    | +                                                      | Significant                                             | 0,549                     | #N/A            |
| PRMT3         | 3,245         | -2,878                                   | +                                                      | Significant                                             | -2,878                    | #N/A            |
| SF3B1         | 2,063         | 1,375                                    | +                                                      | Significant                                             | 1,375                     | #N/A            |
| ASMTL         | 2,587         | 1,611                                    | +                                                      | Significant                                             | 1,611                     | #N/A            |
| STAU1         | 4,005         | -5,635                                   | +                                                      | Significant                                             | -5,635                    | #N/A            |
| AIFM1         | 3,486         | 3,759                                    | +                                                      | Significant                                             | 3,759                     | #N/A            |
| ASS1          | 3,424         | 4,328                                    | +                                                      | Significant                                             | 4,328                     | #N/A            |
| A2M           | 3,241         | 0,844                                    | +                                                      | Significant                                             | 0,844                     | #N/A            |
| C3            | 2,481         | 0,963                                    | +                                                      | Significant                                             | 0,963                     | #N/A            |
| FN1           | 3,516         | -0,897                                   | +                                                      | Significant                                             | -0,897                    | #N/A            |
| TFRC          | 4,251         | 1,636                                    | +                                                      | Significant                                             | 1,636                     | #N/A            |
| TF            | 3,080         | 1,450                                    | +                                                      | Significant                                             | 1,450                     | #N/A            |
| RPLP0;RPLPOP6 | 3,072         | -0,905                                   | +                                                      | Significant                                             | -0,905                    | #N/A            |
| ITGAV         | 4,656         | -2,505                                   | +                                                      | Significant                                             | -2,505                    | #N/A            |
| P4HB          | 3,093         | 1,251                                    | +                                                      | Significant                                             | 1,251                     | #N/A            |
| PABPC1        | 2,982         | 1,116                                    | +                                                      | Significant                                             | 1,116                     | #N/A            |
| CKMT1A        | 2,711         | -4,101                                   | +                                                      | Significant                                             | -4,101                    | #N/A            |
| PTPN1         | 3,407         | 2,621                                    | +                                                      | Significant                                             | 2,621                     | #N/A            |
| ITGB5         | 3,398         | -9,331                                   | +                                                      | Significant                                             | -9,331                    | #N/A            |
| RPL7          | 2,049         | -0,729                                   | +                                                      | Significant                                             | -0,729                    | #N/A            |
| ITGB6         | 5,837         | 6,534                                    | +                                                      | Significant                                             | 6,534                     | #N/A            |
| NCL           | 3,249         | -0,718                                   | +                                                      | Significant                                             | -0,718                    | #N/A            |
| TRIM21        | 2,786         | 3,347                                    | +                                                      | Significant                                             | 3,347                     | #N/A            |
| ITIH2         | 4,624         | -3,488                                   | +                                                      | Significant                                             | -3,488                    | #N/A            |
| SDHB          | 2,445         | -3,240                                   | +                                                      | Significant                                             | -3,240                    | #N/A            |
| TGM2          | 1,627         | -3,883                                   | +                                                      | Significant                                             | -3,883                    | #N/A            |
| TUBG1;TUBG2   | 2,148         | -1,217                                   | +                                                      | Significant                                             | -1,217                    | #N/A            |
| DNAJB1        | 2,811         | 0,978                                    | +                                                      | Significant                                             | 0,978                     | #N/A            |
| ATP5A1        | 2,883         | 0,715                                    | +                                                      | Significant                                             | 0,715                     | #N/A            |
| DDX6          | 4,457         | -7,882                                   | +                                                      | Significant                                             | -7,882                    | #N/A            |
| PTBP1         | 3,813         | 3,390                                    | +                                                      | Significant                                             | 3,390                     | #N/A            |
| CALR          | 2,858         | -2,595                                   | +                                                      | Significant                                             | -2,595                    | #N/A            |
| CANX          | 3,278         | -2,459                                   | +                                                      | Significant                                             | -2,459                    | #N/A            |
| NOS1          | 3,207         | 2,764                                    | +                                                      | Significant                                             | 2,764                     | #N/A            |

|          |       |        |   |             |        |      |
|----------|-------|--------|---|-------------|--------|------|
| RPL12    | 1,894 | -0,889 | + | Significant | -0,889 | #N/A |
| ADSL     | 2,261 | -2,230 | + | Significant | -2,230 | #N/A |
| SDHA     | 2,964 | -3,699 | + | Significant | -3,699 | #N/A |
| RRM2     | 4,475 | -5,004 | + | Significant | -5,004 | #N/A |
| YWHAB    | 2,540 | -0,679 | + | Significant | -0,679 | #N/A |
| RPL9     | 2,829 | -0,527 | + | Significant | -0,527 | #N/A |
| KIF5B    | 2,756 | -2,403 | + | Significant | -2,403 | #N/A |
| ADD1     | 1,545 | -1,502 | + | Significant | -1,502 | #N/A |
| IGFALS   | 2,157 | -1,410 | + | Significant | -1,410 | #N/A |
| ATP6V1A  | 5,813 | 7,405  | + | Significant | 7,405  | #N/A |
| RPL3     | 2,487 | -0,498 | + | Significant | -0,498 | #N/A |
| DDOST    | 2,707 | -2,176 | + | Significant | -2,176 | #N/A |
| RPL5     | 2,564 | -0,650 | + | Significant | -0,650 | #N/A |
| RPL28    | 2,722 | -0,841 | + | Significant | -0,841 | #N/A |
| SERPINH1 | 2,548 | 1,259  | + | Significant | 1,259  | #N/A |
| RPL14    | 3,829 | -4,129 | + | Significant | -4,129 | #N/A |
| FXR1     | 3,339 | -1,268 | + | Significant | -1,268 | #N/A |
| ACLY     | 3,691 | -4,483 | + | Significant | -4,483 | #N/A |
| RPL15    | 4,164 | -0,918 | + | Significant | -0,918 | #N/A |
| RPL27    | 2,066 | -0,778 | + | Significant | -0,778 | #N/A |
| YWHAG    | 3,938 | -1,235 | + | Significant | -1,235 | #N/A |
| YWHAE    | 3,451 | -1,530 | + | Significant | -1,530 | #N/A |
| RPL30    | 2,562 | -0,968 | + | Significant | -0,968 | #N/A |
| RPL10A   | 1,997 | -0,693 | + | Significant | -0,693 | #N/A |
| YWHAZ    | 2,633 | -1,092 | + | Significant | -1,092 | #N/A |
| TUBA4A   | 2,270 | 0,537  | + | Significant | 0,537  | #N/A |
| GTF2I    | 2,530 | -4,431 | + | Significant | -4,431 | #N/A |
| RPL19    | 2,078 | -0,793 | + | Significant | -0,793 | #N/A |
| SORD     | 4,183 | -2,960 | + | Significant | -2,960 | #N/A |
| KIF23    | 2,064 | 1,862  | + | Significant | 1,862  | #N/A |
| REL      | 2,462 | 1,902  | + | Significant | 1,902  | #N/A |
| YWHAH    | 2,915 | -1,571 | + | Significant | -1,571 | #N/A |
| RPL18    | 1,517 | -2,499 | + | Significant | -2,499 | #N/A |
| KLC1     | 2,592 | -3,367 | + | Significant | -3,367 | #N/A |
| GOLGA2   | 3,272 | -2,922 | + | Significant | -2,922 | #N/A |
| ILF2     | 1,405 | -2,024 | + | Significant | -2,024 | #N/A |
| TRIM28   | 2,652 | 1,496  | + | Significant | 1,496  | #N/A |
| G3BP1    | 4,639 | 3,225  | + | Significant | 3,225  | #N/A |
| SQSTM1   | 2,384 | 1,439  | + | Significant | 1,439  | #N/A |
| CUX1     | 3,793 | -2,870 | + | Significant | -2,870 | #N/A |
| TRIM29   | 2,865 | 0,394  | + | Significant | 0,394  | #N/A |
| DYNC1H1  | 4,855 | -2,966 | + | Significant | -2,966 | #N/A |
| MAP7     | 3,541 | -0,449 | + | Significant | -0,449 | #N/A |
| CAPRIN1  | 2,512 | 3,999  | + | Significant | 3,999  | #N/A |
| GAPVD1   | 2,591 | -7,647 | + | Significant | -7,647 | #N/A |
| PON3     | 4,823 | -4,598 | + | Significant | -4,598 | #N/A |
| MAPRE1   | 3,665 | -3,458 | + | Significant | -3,458 | #N/A |
| UPP1     | 1,584 | 2,921  | + | Significant | 2,921  | #N/A |
| PTRF     | 3,381 | 0,715  | + | Significant | 0,715  | #N/A |
| MTHFD1L  | 2,064 | -0,631 | + | Significant | -0,631 | #N/A |

|          |       |        |   |             |        |      |
|----------|-------|--------|---|-------------|--------|------|
| MARK2    | 3,861 | -8,390 | + | Significant | -8,390 | #N/A |
| LSM14A   | 2,896 | -4,340 | + | Significant | -4,340 | #N/A |
| NPLOC4   | 2,320 | -2,413 | + | Significant | -2,413 | #N/A |
| GEMIN5   | 1,548 | 1,578  | + | Significant | 1,578  | #N/A |
| PPP1R13L | 2,943 | 0,491  | + | Significant | 0,491  | #N/A |
| TTN      | 4,414 | -3,141 | + | Significant | -3,141 | #N/A |
| ARHGEF1  | 3,884 | -5,010 | + | Significant | -5,010 | #N/A |
| UFD1L    | 2,658 | -2,335 | + | Significant | -2,335 | #N/A |
| ARHGEF2  | 4,061 | -5,655 | + | Significant | -5,655 | #N/A |
| HOOK2    | 3,353 | -4,099 | + | Significant | -4,099 | #N/A |
| EDC3     | 5,349 | 4,711  | + | Significant | 4,711  | #N/A |
| DOCK7    | 3,287 | 1,886  | + | Significant | 1,886  | #N/A |
| C9orf156 | 2,575 | -3,518 | + | Significant | -3,518 | #N/A |
| PRKD2    | 3,616 | 2,962  | + | Significant | 2,962  | #N/A |
| VPS33B   | 2,304 | -2,709 | + | Significant | -2,709 | #N/A |
| OSBPL3   | 2,268 | 0,608  | + | Significant | 0,608  | #N/A |
| RABEP2   | 3,605 | 2,175  | + | Significant | 2,175  | #N/A |
| C2orf44  | 2,433 | -4,974 | + | Significant | -4,974 | #N/A |
| VIPAS39  | 2,249 | -3,009 | + | Significant | -3,009 | #N/A |
| RPRD1B   | 2,213 | 2,055  | + | Significant | 2,055  | #N/A |
| 44448    | 2,102 | 1,946  | + | Significant | 1,946  | #N/A |
| PSME2    | 4,357 | -2,666 | + | Significant | -2,666 | #N/A |
| G3BP2    | 4,495 | 2,869  | + | Significant | 2,869  | #N/A |
| NUDC     | 2,912 | -9,358 | + | Significant | -9,358 | #N/A |
| SNX24    | 3,571 | -3,336 | + | Significant | -3,336 | #N/A |
| MYO5A    | 2,559 | 3,808  | + | Significant | 3,808  | #N/A |
| DNAJC15  | 2,506 | -1,900 | + | Significant | -1,900 | #N/A |
| PEX16    | 1,949 | -0,679 | + | Significant | -0,679 | #N/A |
| ARFGEF1  | 2,562 | 3,544  | + | Significant | 3,544  | #N/A |

**Table S4. Primary antibody list**

| Antibody                                   | Clone   | Obtained from                      | Host       | Application                          |
|--------------------------------------------|---------|------------------------------------|------------|--------------------------------------|
| <b>Integrin <math>\beta</math>5</b>        | EM09902 | Simon Goodman (Merck KGaA)         | Rabbit mAb | IF/FACS: 1:200                       |
| <b>Integrin <math>\beta</math>5 - cyto</b> | 5HK2    | Homemade                           | Rabbit pAb | WB: 1:1000<br>IP: 1 $\mu$ l / sample |
| <b>Integrin <math>\beta</math>1 - cyto</b> | U19     | Ulrike Mayer                       | Rabbit pAb | WB: 1:1000                           |
| <b>Integrin <math>\beta</math>3</b>        | C17     | Ellen van der Schoot               | Mouse mAb  | FACS: 1:100                          |
| <b>Integrin <math>\beta</math>6 - cyto</b> | 5HK1    | Homemade                           | Rabbit pAb | IP: 1 $\mu$ l / sample               |
| <b>Vinculin</b>                            | VIIIF9  | Marina Glukhova                    | Mouse mAb  | IF: 1:5                              |
| <b>Talin</b>                               | 8d4     | Sigma                              | Mouse mAb  | IF: 1:200<br>WB: 1:1000              |
| <b>ARH/LDLRAP1</b>                         |         | AntibodyPlus (#A7093)              | Rabbit pAb | WB: 1:1000                           |
| <b>Numb</b>                                | S.925.4 | Invitrogen (#MA5-14897)            | Rabbit mAb | WB: 1:1000                           |
| <b>Clathrin, Heavy chain</b>               | X22     | Thermo Fisher (#MA1-065)           | Mouse mAb  | IF: 1:400                            |
| <b>Dab2</b>                                |         | Cell Signaling (#12906)            | Rabbit mAb | WB: 1:500                            |
| <b>Kindlin-1</b>                           |         | Homemade (Ussar et al., 2006)      | Rabbit pAb | WB: 1:5000                           |
| <b>Kindlin-2</b>                           | 3A3     | EMD Millipore (#MAB2617)           | Mouse mAb  | WB: 1:1000                           |
| <b>KANK-2</b>                              |         | Sigma (#HPA015643)                 | Rabbit pAb | WB: 1:2000                           |
| <b>SNX17</b>                               |         | ProteinTech (#10275-1-AP)          | Rabbit pAb | WB: 1:1000                           |
| <b>Akt-phospho S473</b>                    |         | Cell Signaling Technology (#9271)  | Rabbit pAb | WB: 1:1000                           |
| <b>Akt</b>                                 |         | Cell Signaling Technology (#9272)  | Rabbit pAb | WB: 1:1000                           |
| <b>Erk1/2-diphospho</b>                    |         | Sigma (#M8159)                     | Mouse mAb  | WB: 1:1000                           |
| <b>Erk1/2</b>                              |         | Cell Signaling (#9102)             | Rabbit pAb | WB: 1:1000                           |
| <b>FAK-phospho Y397</b>                    |         | Invitrogen (#44624G)               | Rabbit pAb | WB: 1:1000                           |
| <b>FAK</b>                                 | 77      | BD Bioscience #610087              | Mouse mAb  | WB: 1:1000                           |
| <b>GEF-H1-phospho S886</b>                 | E1L6D   | Cell Signaling Technology (#14143) | Rabbit mAb | WB: 1:1000                           |
| <b>GEF-H1</b>                              |         | Abcam (#ab155785)                  | Rabbit pAb | WB: 1:1000                           |
| <b>MARK2</b>                               |         | Proteintech (#15492-1-AP)          | Rabbit pAb | WB: 1:1000                           |
| <b>MARK2</b>                               |         | Cell Signaling Technology (#9118)  | Rabbit pAb | WB: 1:1000                           |
| <b>MLC-phospho S19</b>                     |         | Cell Signaling Technology (#3671)  | Rabbit pAb | WB: 1:500                            |
| <b>P115 RhoGEF</b>                         | C-19    | Santa Cruz                         | Goat pAb   | WB: 1:1000                           |
| <b>GAPDH</b>                               | 6C5     | EMD Millipore (#CB1001)            | Mouse mAb  | WB: 1:5000                           |
